# Supplementary material
Source: Research Square preprint supplement (doi:10.21203/rs.3.rs-10282905/v1)
Supplement: Supplementary file 1 [file f0772039943639635bef66f6.docx]

**Supplementary Information**

**Supplementary methods**

**Plasmids, shRNAs, siRNAs and sgRNA**

The expression vectors pcDNA3.1-PRMT1-FLAG (WT and G80R), pcDNA3.1-YBX1-HA (WT and R69K), pcDNA3.1-AKT-FLAG, and pcDNA3.1-NSUN2-HA were custom-synthesized by YouBio Biotechnology (Changsha, China). Additionally, shRNA plasmids targeting PRMT1, PRMT1-specific siRNA, sgRNA plasmids targeting YBX1, YBX1-specific siRNA, and NSUN2-specific siRNA were acquired from GenePharma (Suzhou, China). The validated sequences for these shRNAs, siRNAs, and sgRNAs are listed in Table S1. All transfections were conducted using Lipofectamine 3000 (Invitrogen, Cat.#L3000015) in accordance with the manufacturer’s protocol.

**Lentivirus packaging and generation of stable cells**

Gene-specific shRNA constructs targeting candidate genes were obtained from GenePharma (Suzhou, China) and subsequently validated by western blotting. For lentivirus production, HEK293T cells were co-transfected with the shRNA or sgRNA plasmid, the PxpAx2 packaging plasmid, and the PMD2g envelope plasmid (GenePharma, Suzhou, China) at a mass ratio of 4:3:1, utilizing Lipofectamine 3000 reagent (Invitrogen, Cat.#L3000015). Viral supernatants were harvested 48 h post‑transfection and filtered through 0.45 μm nitrocellulose filters (Millipore, Cat.#HAWP04700). GSCs were transduced with the filtered viral particles for 48 h, followed by selection in medium containing 5 μg/mL puromycin (Beyotime, Cat.#ST551) for 1 to 2 weeks to establish stably transduced cell populations.

**Real-time quantitative PCR (RT-qPCR)**

Total RNA was extracted using the RNAiso Plus reagent (Takara, Cat.#9108). Complementary DNA (cDNA) synthesis was performed with the TOYOBO reverse transcription kit (Toyobo, Cat.#FSQ201), adhering to the manufacturer’s protocol. Quantitative real‑time PCR (qPCR) was conducted on a Roche LightCycler 480 System utilizing TB Green Premix Ex Taq II (Takara, Cat.#RR820A) following the recommended cycling conditions provided by the manufacturer. The relative expression levels of target genes were calculated by the 2-ΔΔCt method, with β‑actin serving as the internal reference. All primers were synthesized by BGI Genomics, and the corresponding sequences can be found in Table S2. Each qPCR reaction included three technical replicates, and all experiments were repeated with three independent biological replicates.

**Western blotting**

Cells or tissues were lysed in RIPA buffer (Beyotime, Cat.#P0013B) supplemented with protease and phosphatase inhibitors (Beyotime, Cat.#ST507) for 30 minutes at 4°C, followed by ultrasonication for 20 seconds. After centrifugation at 12,000×g for 10 minutes at 4°C, the supernatant was collected and total protein was quantified using a BCA assay kit (Beyotime, Cat.#P0012). Proteins were denatured with 5× loading buffer (Beyotime, Cat.#P0015L) by boiling at 100°C for 10 minutes. Equal amounts of protein (30 μg) were separated on 10%-12% SDS‑PAGE gels and transferred onto nitrocellulose membranes (Millipore, Cat.#HATF00010) at a constant current of 300 mA under ice-cold conditions. Membranes were blocked with 5% non‑fat milk in TBST for 1 h at room temperature with gentle shaking, washed with TBST, and then probed with primary antibodies overnight at 4°C with agitation. After additional washes, the membranes were incubated with species‑appropriate HRP‑conjugated secondary antibodies (Proteintech, Cat.#SA00001-1/SA00001-2) for 1 h at room temperature. Immunoreactive bands were visualized using an ECL detection system (Millipore, Cat.#WBKLS0500) and captured with a chemiluminescence imaging system (Bio-Rad). Band intensities were quantified using ImageJ software (NIH, Rockville, USA). Primary antibodies used for immunoblot were: anti-PRMT1 (Abcam, Cat.#ab73246, 1:1000), anti-YBX1 (Proteintech, Cat.#20339-1-AP, 1:5000), anti-p-YBX1 (CST, Cat.#2900S, 1:1000), anti-AKT (CST, Cat.#9272S, 1:1000), anti-p-AKT (CST, Cat.#4060S, 1:1000), anti‑YBX1-R69me2a (GL Biochem Shanghai, custom purified antibody, 1:500), anti‑aDMA (CST, Cat.#13522S, 1:1000), anti-H4R3me2a (Abcam, Cat.#ab5823, 1:500), anti-Histone H4 (Proteintech, Cat.#16047-1-AP, 1:1000), anti-FLAG (CST, Cat.#14793, 1:1000), anti-HA (CST, Cat.#3724, 1:1000), anti-CDCA5 (Proteintech, Cat.#67418-1-lg, 1:1000), anti-PKMYT1 (Proteintech, Cat.#67806-1-lg, 1:5000), anti-NSUN2 (Proteintech, Cat.#20854-1-AP, 1:10000), anti-E2F1 (CST, Cat.#3742S, 1:1000), anti-CDK1 (Proteintech, Cat.#19532-1-AP, 1:2000), anti-CDK2 (CST, Cat.#2546, 1:1000), anti-Cyclin D1 (CST, Cat.#55506, 1:1000), anti-Cyclin B1 (CST, Cat.#4138S, 1:1000), anti-P53 (CST, Cat.#9282S, 1:1000), anti-P21 (CST, Cat.#2947S, 1:1000), anti-β-actin (Proteintech, Cat.#66009-1-lg, 1:20000), anti-GAPDH (Proteintech, Cat.#60004-1-lg, 1:50000) and anti-LaminB1 (Proteintech, Cat.#66095-1-lg, 1:20000).

## **Cell cycle analysis**

## Cell cycle distribution was detected using a cell cycle staining kit (Beyotime, Cat.#C1052). Cells were harvested and fixed with pre-cold 70% ethanol (Sinopharm, Cat.#80061718) at 4 °C overnight. Then cells were incubated in 500 µL staining buffer containing 25 µL Propidium Iodide (PI) and 10 µL RNase A at room temperature for 30 minutes in the dark. Stained cells were immediately analyzed with a CytExpert flow cytometer (Beckman Coulter, USA). Flow cytometry data were analyzed with CytExpert software v2.4, each experiment repeated three independent biological times.

**Hematoxylin and eosin (H&E) staining**

Five-micrometer sections containing the needle tract were baked at 60°C for 30 to 45 minutes, deparaffinized in xylene (Sinopharm, Cat.#10023418), and rehydrated through a graded ethanol series. The sections were stained with hematoxylin (Beyotime, Cat.#C0107) for 5 to 10 minutes, rinsed with distilled water, and differentiated in 1% acid-alcohol for 5 to 20 seconds. After additional rinses with distilled water, nuclear staining was verified microscopically to confirm the appropriate blue coloration against a colorless cytoplasm. The sections were then washed under running tap water for 10 minutes until a blue hue was achieved, and counterstained with eosin (Beyotime, Cat.#C0109) for approximately 5 minutes. Excess eosin was removed by gentle rinsing, and cytoplasmic pinkish-red staining was confirmed under the microscope. Following dehydration through a reverse ethanol series and clearing in xylene, the sections were air-dried, mounted with 30 μL of neutral balsam under coverslips, and imaged using an Olympus light microscope.

**Immunohistochemistry (IHC)**

Sections of human glioma or mouse brain tissues embedded in paraffin (5μm thick) were mounted on slides coated with poly-lysine (Solarbio, Cat.#P8990). After baking at 60°C for 40 minutes, the sections were deparaffinized in xylene and rehydrated through a graded series of ethanol. Heat-induced antigen retrieval was performed by pressure cooking in citrate buffer (Solarbio, Cat.#C1032) for two cycles of 3 minutes boiling, separated by a cooling interval. The sections were then blocked with 10% normal goat serum (Solarbio, Cat.#SL038) for 1 h at room temperature and incubated overnight at 4°C in a humidified chamber with appropriately diluted primary antibodies. Following three washes with PBS for 5 minutes each, the sections were incubated with corresponding secondary antibodies for 30 minutes at 37°C. After additional PBS washes, the sections were treated with Streptavidin‑Biotin Complex (SABC, Boster, Cat.#SA1022) for 30 minutes at room temperature. Immunoreactivity was visualized using DAB (Boster, Cat.#AR1022) substrate for 1 to 3 minutes under microscopic monitoring, with the reaction terminated by rinsing with distilled water. Counterstaining was performed using hematoxylin (Beyotime, Cat.#C0107) for 2 minutes, followed by differentiation in 1% acid alcohol and bluing under running tap water. Finally, the sections were dehydrated through a graded ethanol series, cleared in xylene, and mounted with neutral balsam. Images were captured using a microscope, and positive signals were quantified using ImageJ software (NIH, Rockville, USA). All IHC quantification was performed in a single-blinded manner by two independent researchers.

**EdU assay**

Cell proliferation was assessed using an EdU incorporation kit (RiboBio, Cat.#C10310-1) according to the manufacturer’s instructions. In brief, cells were seeded onto 35 mm glass-bottom dishes (Cellvis, Cat.#D35-20-1-N) and incubated with EdU-containing medium (diluted at 1:1000) for 4 h at 37°C. Following fixation with 4% paraformaldehyde (PFA, Solarbio, Cat.#P1110), the cells were stained with Apollo Dye solution for 30 minutes at room temperature in the dark. Nuclei were counterstained with DAPI (Beyotime, Cat.#C1002), and images were acquired using a Zeiss LSM880 confocal microscope (Zeiss, Germany). The proportion of EdU‑positive cells was quantified with ImageJ software (NIH, Rockville, USA), and the proliferation rate was calculated as (EdU‑positive cell count / total cell count) × 100%. Three independent biological replicates were performed for each group.

**CCK‑8 assay**

To assess the proliferation of engineered GSCs, specifically GSC23, GSC11, and GSC464 cells were seeded into 96-well plates pre-coated with Matrigel (Corning, Cat.#356234) at a density of 2×10³cells per well. At each specified time point over a 5‑day period, CCK‑8 reagent (Dojindo, Cat.#CK04-05) was added to achieve a final concentration of 10%.The plates were then incubated for 1 h at 37°C in the dark. Subsequently, the absorbance was measured at 450 nm using a multifunctional microplate reader (Berthold Technology, USA). Each time point included five technical replicates, and the full experiment was repeated three times independently.

**Immunofluorescence staining**

GSC23 and GSC11 cells cultured on 35 mm glass coverslips were fixed with 4% paraformaldehyde at room temperature and subsequently permeabilized with 0.5% Triton X-100 for 10 minutes. To block non-specific binding, the cells were treated with 10% bovine serum albumin (BSA, Solarbio, Cat.#A8020) for 1 h at room temperature. The cells were then incubated overnight at 4°C in a humidified chamber with primary antibodies against PRMT1 (Abcam, Cat.#ab73246, 1:1000) and YBX1 (Santa Cruz, Cat.#sc-101198, 1:100). After three washes with PBS containing 0.1% Tween-20 (PBST), the cells were incubated with fluorochrome-conjugated secondary antibodies (Invitrogen, Cat.#A11008/A11001) for 1 h at room temperature, while being protected from light. Following three additional washes with PBST, the nuclei were counterstained with DAPI (Beyotime, Cat.#C1002), and fluorescence images were acquired using a Zeiss LSM880 confocal microscope (Zeiss, Germany).

**Nuclear and cytoplasmic protein extraction**

GSC23, GSC11, and HEK293T cells were harvested by centrifugation at 500 × g for 5 minutes at 4 °C. The cells were washed once with ice-cold PBS, and subsequently pelleted again, after which the supernatant was carefully removed. Nuclear and cytoplasmic extracts were prepared using the NE‑PER Nuclear and Cytoplasmic Extraction Kit (Thermo Scientific, Cat.#78835) according to the manufacturer’s instructions. Briefly, the cell pellet was resuspended in ice‑cold CER I buffer supplemented with protease inhibitors (Beyotime, Cat.#ST507), vortexed vigorously for 15 seconds, and incubated on ice for 10 minutes. Ice‑cold CER II was then added, and the mixture was vortexed for 5 seconds, followed by a 1 minute incubation on ice. The mixture was vortexed again for 5 seconds and centrifuged at 16,000 × g for 5 minutes at 4 °C. The supernatant, representing the cytoplasmic fraction, was transferred to a fresh tube. The insoluble pellet was resuspended in ice‑cold NER supplemented with protease inhibitors, vortexed for 15 seconds, and incubated on ice for 40 minutes with intermittent vortexing for 15 seconds every 10 minutes. After centrifugation at 16,000 × g for 10 minutes at 4 °C, the supernatant, which constituted the nuclear fraction, was collected. Protein extracts were resolved by SDS‑PAGE and analyzed by western blotting, using GAPDH as a cytoplasmic loading control and Lamin B1 as a nuclear loading control.

**TAT-tagged peptide synthesis**

The synthetic peptide KWFNVRNGYGFINR, corresponding to residues 64-77 of YBX1, contains the R69 methylation site and is linked at the N-terminus to a cell‑penetrating TAT peptide to enhance cellular delivery. In the methylated variant, the R69 residue is modified by dimethylation, while it remains unmodified in the non‑methylated counterpart. For the biotinylated peptides, the biotin moiety was conjugated to the N‑terminus of the TAT peptide. All peptides were custom‑synthesized by GL Biochem (Shanghai) Ltd., purified to over 95% purity by HPLC, and confirmed by LC‑MS.

**Animal experiments**

All animal procedures were approved by the Animal Ethics Committee of The First Affiliated Hospital of USTC, Division of Life Sciences and Medicine (Animal Ethics Approval No. USTCACUC26060125038). For the intracranial orthotopic xenografts, four‑week‑old female BALB/c‑nu nude mice (SLAC Laboratory Animal Company, Shanghai, China) were anesthetized via intraperitoneal injection of sodium pentobarbital (40 mg/kg, Sigma, Cat.#P3761). After confirming steady respiration and the loss of the pedal withdrawal reflex, the animals were secured in a stereotactic frame (RWD Life Science, Cat.#68001). A cranial injection site was identified 0.5 mm posterior to the bregma and 2.5 mm lateral to the midline. A small burr hole (0.8-1.0 mm in diameter) was meticulously drilled using a micro‑drill, taking care to avoid damage to the meninges and blood vessels. GSC23 cells transduced with control shGFP or shPRMT1 lentiviral vectors were harvested, resuspended, and slowly injected through the burr hole using a micro‑syringe to a depth of 2.5 mm below the dura, at a rate of 2 μL/min (total volume 10 μL). Postoperative body weight was closely monitored, with significant weight loss or neurological deficits, indicative of compromised welfare due to intracranial tumor growth, were predefined as humane endpoints. At this stage, survival time was recorded, and the mice were deeply anesthetized for transcardial perfusion and brain extraction. The brains were fixed in 4% paraformaldehyde, then processed through graded ethanol dehydration, paraffin embedding, and sectioning. Tumor volume was assessed by identifying the largest cross‑sectional area, measuring the longest (a) and shortest (b) diameters using ImageJ, and applying the formula V = (a × b²) / 2.

For the subcutaneous xenograft experiments, GSC23 cells (1×10⁷ cells) were suspended in 100 μL of a 1:1 PBS/Matrigel mixture and injected subcutaneously into female BALB/c nude mice under optimal growth conditions. Starting on day 5 post‑implantation, a peptide solution (10 mg/kg) was administered intraperitoneally every other day for a duration of 2 weeks. Tumor size was monitored bi-daily from day 5 onward using a vernier caliper to measure two perpendicular diameters, with tumor volume (mm³) calculated using the formula 1/2 × length × width². All mice were observed daily and euthanized at week 3. The subcutaneous tumor tissues were subsequently photographed and subjected to IHC analysis.

**Supplementary figures**


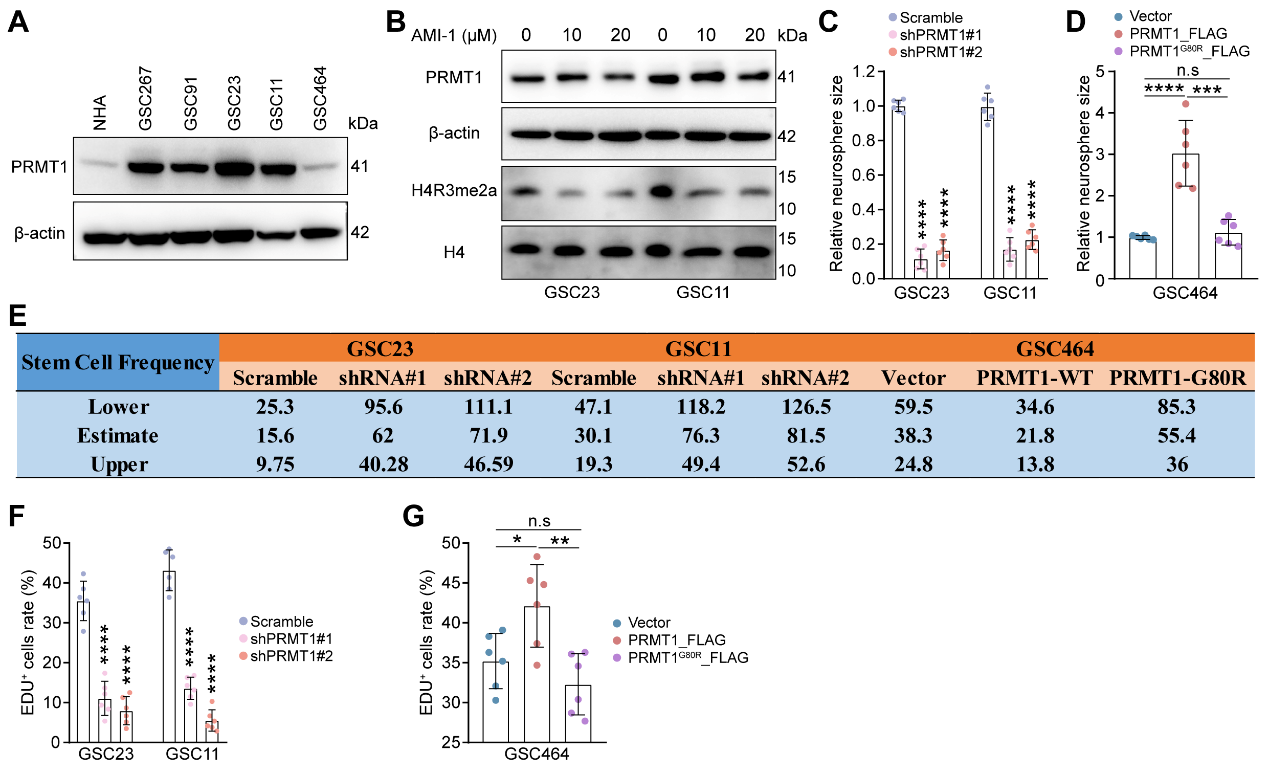


**Fig. S1 PRMT1 expression and functional validation in GSCs.** (**A**) Western blotting analysis of PRMT1 expression in normal human astrocytes (NHA) and glioma stem cell lines (GSC267, GSC91, GSC23, GSC11, and GSC464).(**B**) Western blotting analysis of PRMT1 and H4R3me2a levels in GSC23 and GSC11 cells treated with the PRMT1 inhibitor AMI-1.(**C**, **D**) Quantification of neurosphere size in GSC23 and GSC11 cells following PRMT1 knockdown (**C**) and in GSC464 cells following overexpression of PRMT1-WT or PRMT1-G80R (**D**). (**E**) Quantification of extreme limiting dilution analysis (ELDA) showing sphere-forming frequency in GSC23 and GSC11 cells following PRMT1 knockdown and in GSC464 cells following overexpression of PRMT1-WT or PRMT1-G80R. (**F**, **G**) Quantification of EdU-positive cells in GSC23 and GSC11 cells following PRMT1 knockdown (**F**) and in GSC464 cells following overexpression of PRMT1-WT or PRMT1-G80R (**G**).*P < 0.05, **P < 0.01, ***P < 0.001, ****P < 0.0001; n.s, not significant.


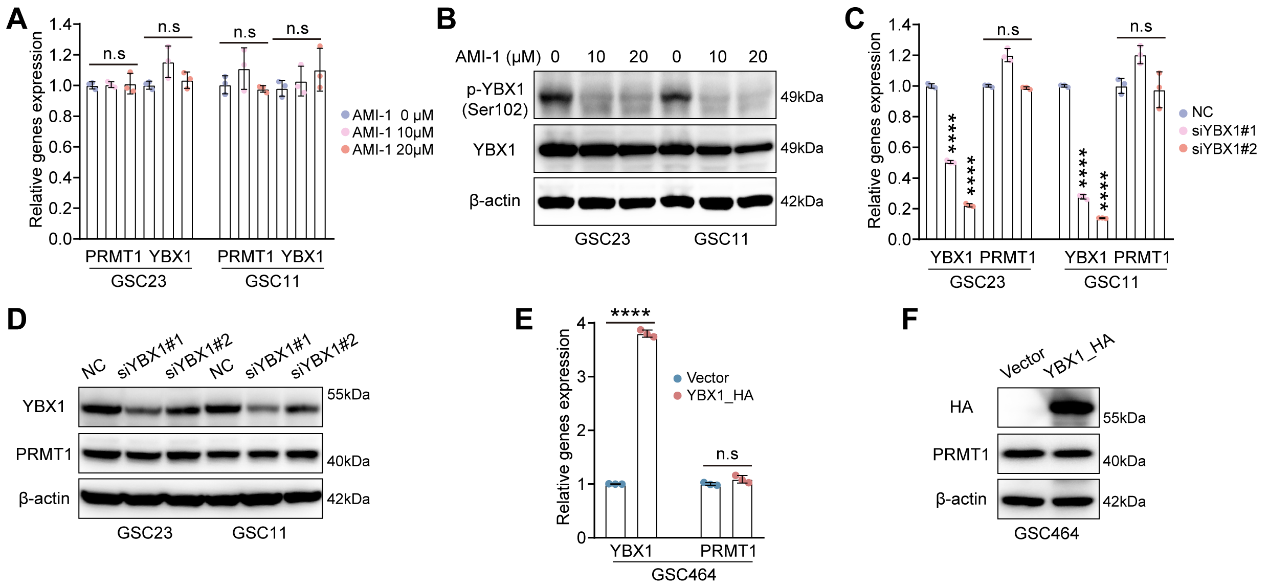


**Fig. S2 PRMT1 promotes YBX1 phosphorylation in GSCs.** (**A**) RT-qPCR analysis of PRMT1 and YBX1 expression in GSC23 and GSC11 cells treated with AMI-1. (**B**) Western blotting analysis of total YBX1 and phospho-YBX1 (Ser102) in GSC23 and GSC11 cells treated with AMI-1. (**C**, **D**) RT-qPCR (**C**) and immunoblot (**D**) analyses of YBX1 and PRMT1 expression in GSC23 and GSC11 cells following YBX1 knockdown. (**E**, **F**) RT-qPCR (**E**) and immunoblot (**F**) analyses of YBX1 and PRMT1 expression in GSC464 cells following YBX1 overexpression. ****P < 0.0001; n.s: not significant.


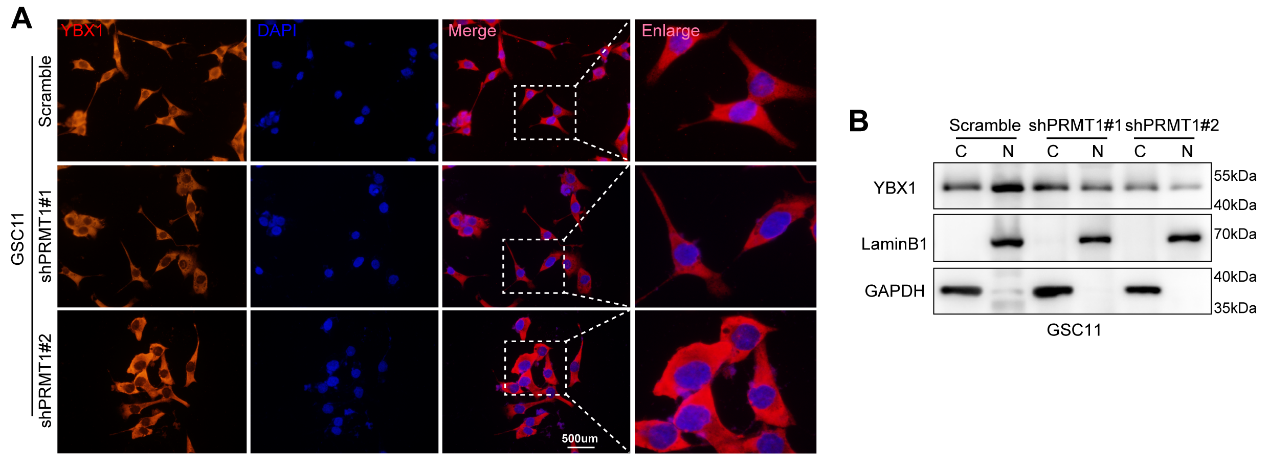


**Fig. S3 PRMT1 depletion alters YBX1 subcellular localization in GSCs.** (**A**) Representative immunofluorescence images showing YBX1 (red) localization in GSC11 cells following PRMT1 knockdown. Nuclei were counterstained with DAPI (blue). Scale bars, 500 μm. (**B**) Immunoblot analysis of YBX1 in cytoplasmic and nuclear fractions of GSC11 cells following PRMT1 knockdown. GAPDH and Lamin B1 served as cytoplasmic and nuclear fraction controls, respectively.


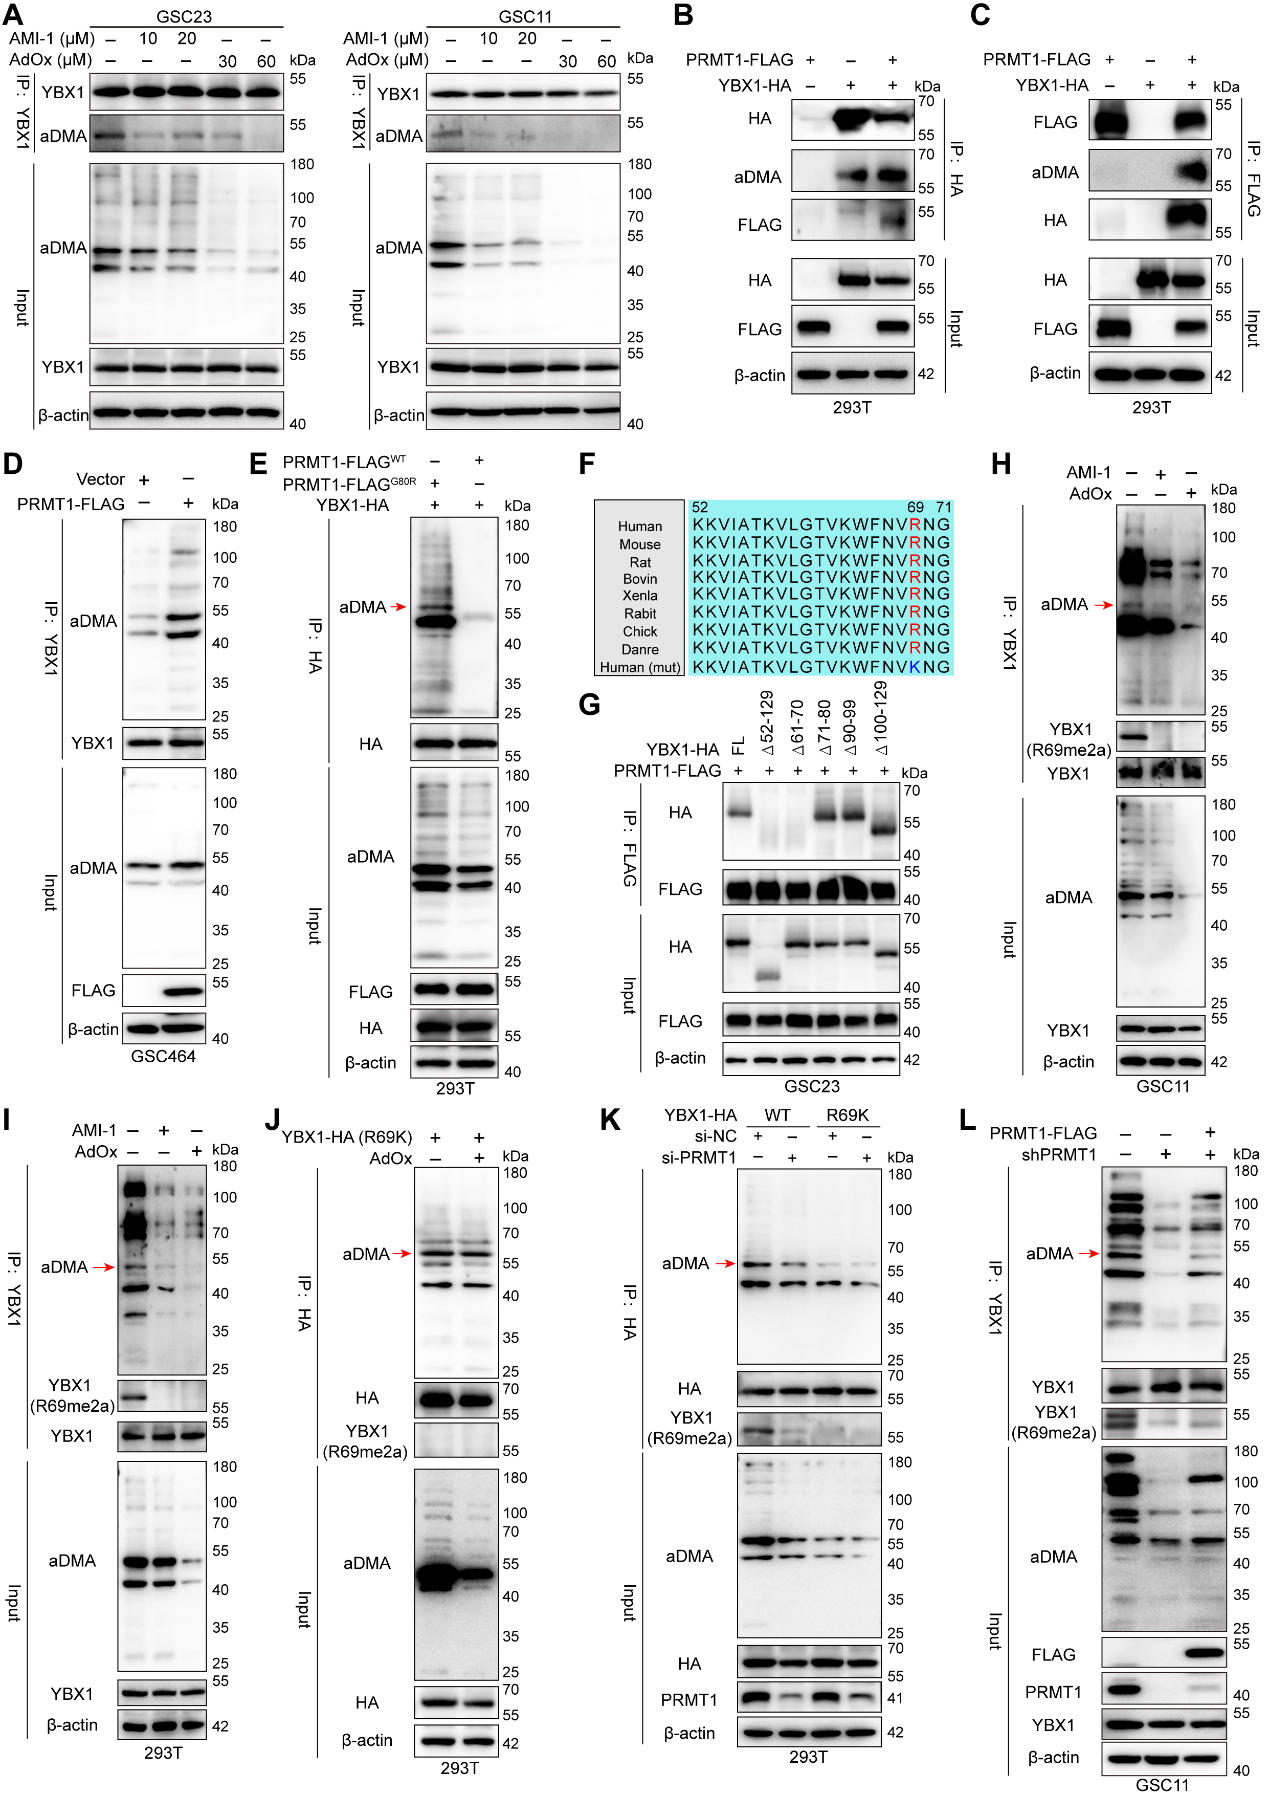


**Fig. S4 PRMT1 mediates YBX1 Arg69 methylation in GSCs.** (**A**) Co-IP assays in GSC23 and GSC11 cells treated with AMI-1 or AdOx, using an anti-YBX1 antibody, followed by immunoblotting with anti-aDMA and anti-YBX1 antibodies.(**B**, **C**) Co-IP and methylation analysis of exogenous PRMT1 and YBX1 in HEK293T cells co-transfected with FLAG-tagged PRMT1 and HA-tagged YBX1. Reciprocal immunoprecipitation was performed using anti-HA (**B**) or anti-FLAG (**C**) magnetic beads, followed by immunoblot analysis.(**D**) Co-IP and methylation analysis in GSC464 cells following PRMT1 overexpression using an anti-YBX1 antibody, followed by immunoblotting with anti-aDMA and anti-YBX1 antibodies. (**E**) Co-IP and methylation analysis in HEK293T cells co-transfected with HA-tagged YBX1 and either wild-type or mutant FLAG-tagged PRMT1 (PRMT1-WT or PRMT1-G80R), followed by anti-HA immunoprecipitation and immunoblot analysis. (**F**) Protein sequence alignment of the YBX1 cold-shock domain (CSD) from the indicated species showing conservation of Arg69, together with a schematic of the R69K point mutant generated for functional analysis. (**G**) Co-IP assay in GSC23 cells co-transfected with FLAG-tagged PRMT1 and HA-tagged full-length or CSD-deletion YBX1 constructs. PRMT1 complexes were immunoprecipitated with anti-FLAG beads and analyzed by immunoblotting with an anti-HA antibody. (**H**, **I**) Endogenous YBX1 was immunoprecipitated from GSC11 (**H**) and HEK293T (**I**) cells treated with AMI-1 or AdOx, followed by immunoblot analysis of aDMA and YBX1-R69me2a. (**J**) HEK293T cells expressing HA-tagged YBX1-R69K were treated with or without AdOx, followed by anti-HA immunoprecipitation and immunoblot analysis of aDMA and YBX1-R69 methylation.(**K**) HEK293T cells expressing HA-tagged YBX1-WT or YBX1-R69K were subjected to PRMT1 knockdown or control treatment, followed by anti-HA immunoprecipitation and immunoblot analysis of aDMA and YBX1-R69 methylation.(**L**) GSC11 cells with stable PRMT1 knockdown were reconstituted with ectopic PRMT1 or vector control. Endogenous YBX1 was immunoprecipitated with an anti-YBX1 antibody, and aDMA and YBX1-R69 methylation levels were analyzed by immunoblotting.


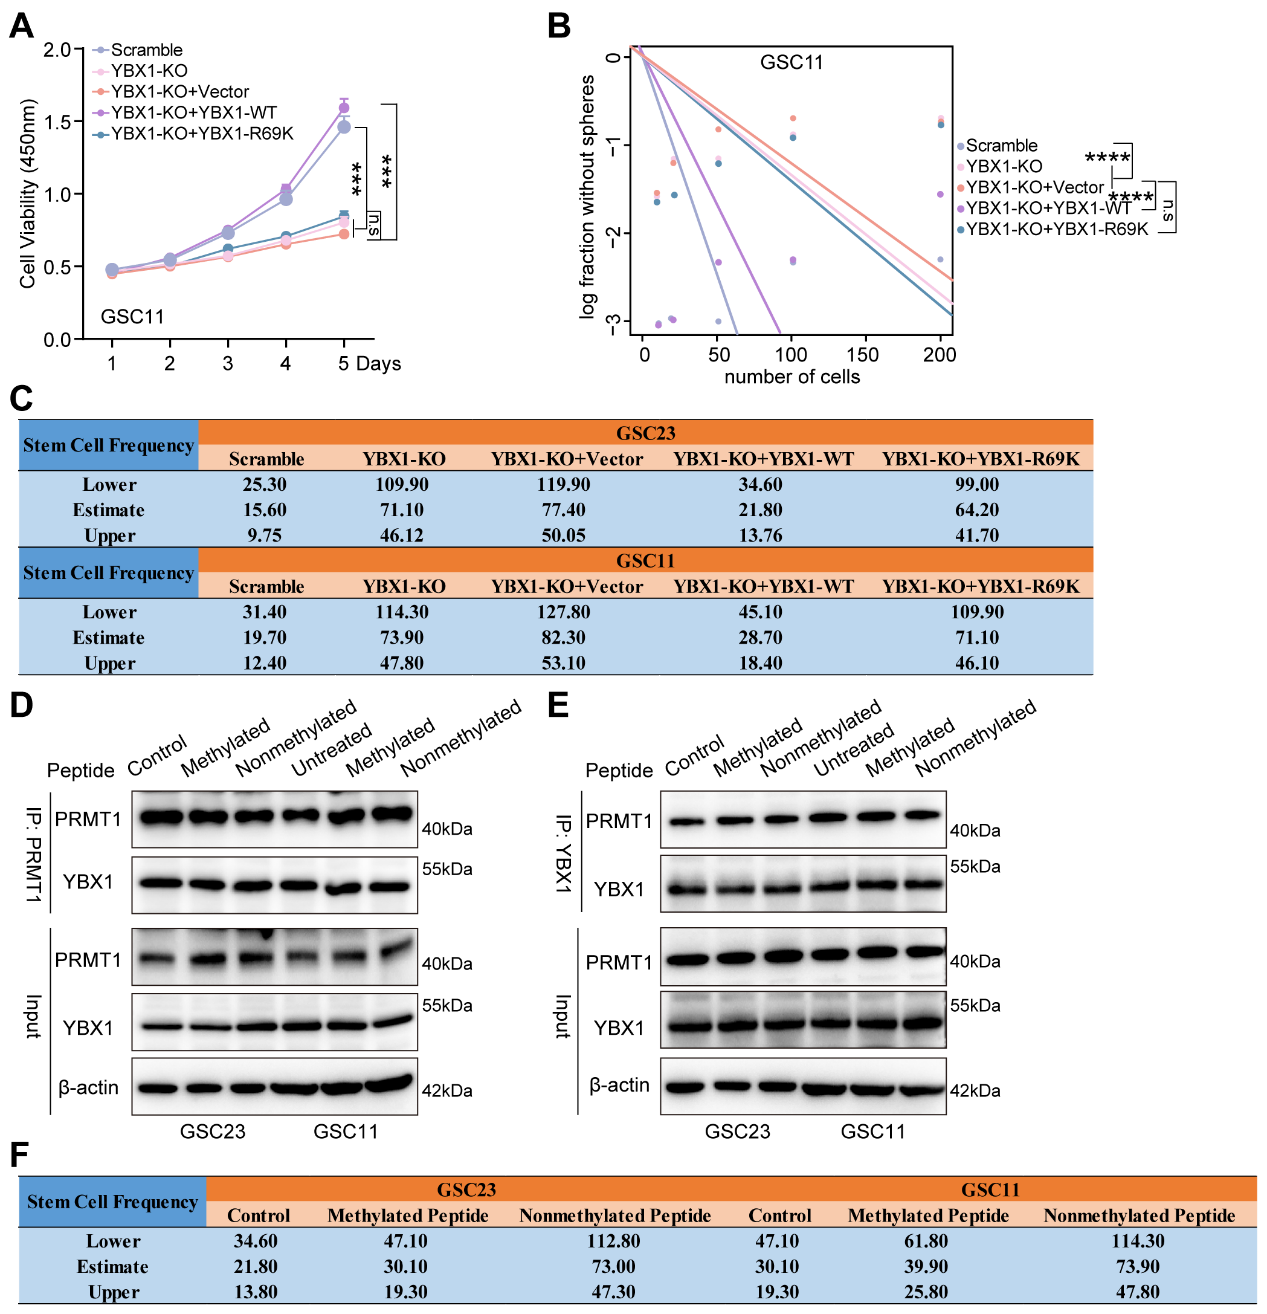


**Fig. S5 PRMT1-mediated YBX1 methylation at R69 is indispensable for GSC proliferation and self-renewal.** (**A**) CCK-8 assay showing proliferation of GSC11 cells with YBX1 knockout (YBX1-KO) reconstituted with vector control, YBX1-WT, or YBX1-R69K. (**B**, **C**) ELDA of sphere-forming frequency in GSC11 cells reconstituted with vector control, YBX1-WT, or YBX1-R69K following YBX1 knockout (**B**), and quantitative analysis of sphere-forming frequency in GSC23 and GSC11 cells under the same conditions (**C**). (**D**, **E**) GSC23 and GSC11 cells were treated with peptides (20 μM, 48 h). Lysates were subjected to immunoprecipitation with anti-PRMT1 (**D**) or anti-YBX1 (**E**) antibodies, followed by immunoblot analysis of YBX1 or PRMT1 using the indicated antibodies. (**F**) ELDA of sphere-forming frequency in GSC23 and GSC11 cells treated with peptides (20 μM, 48 h).


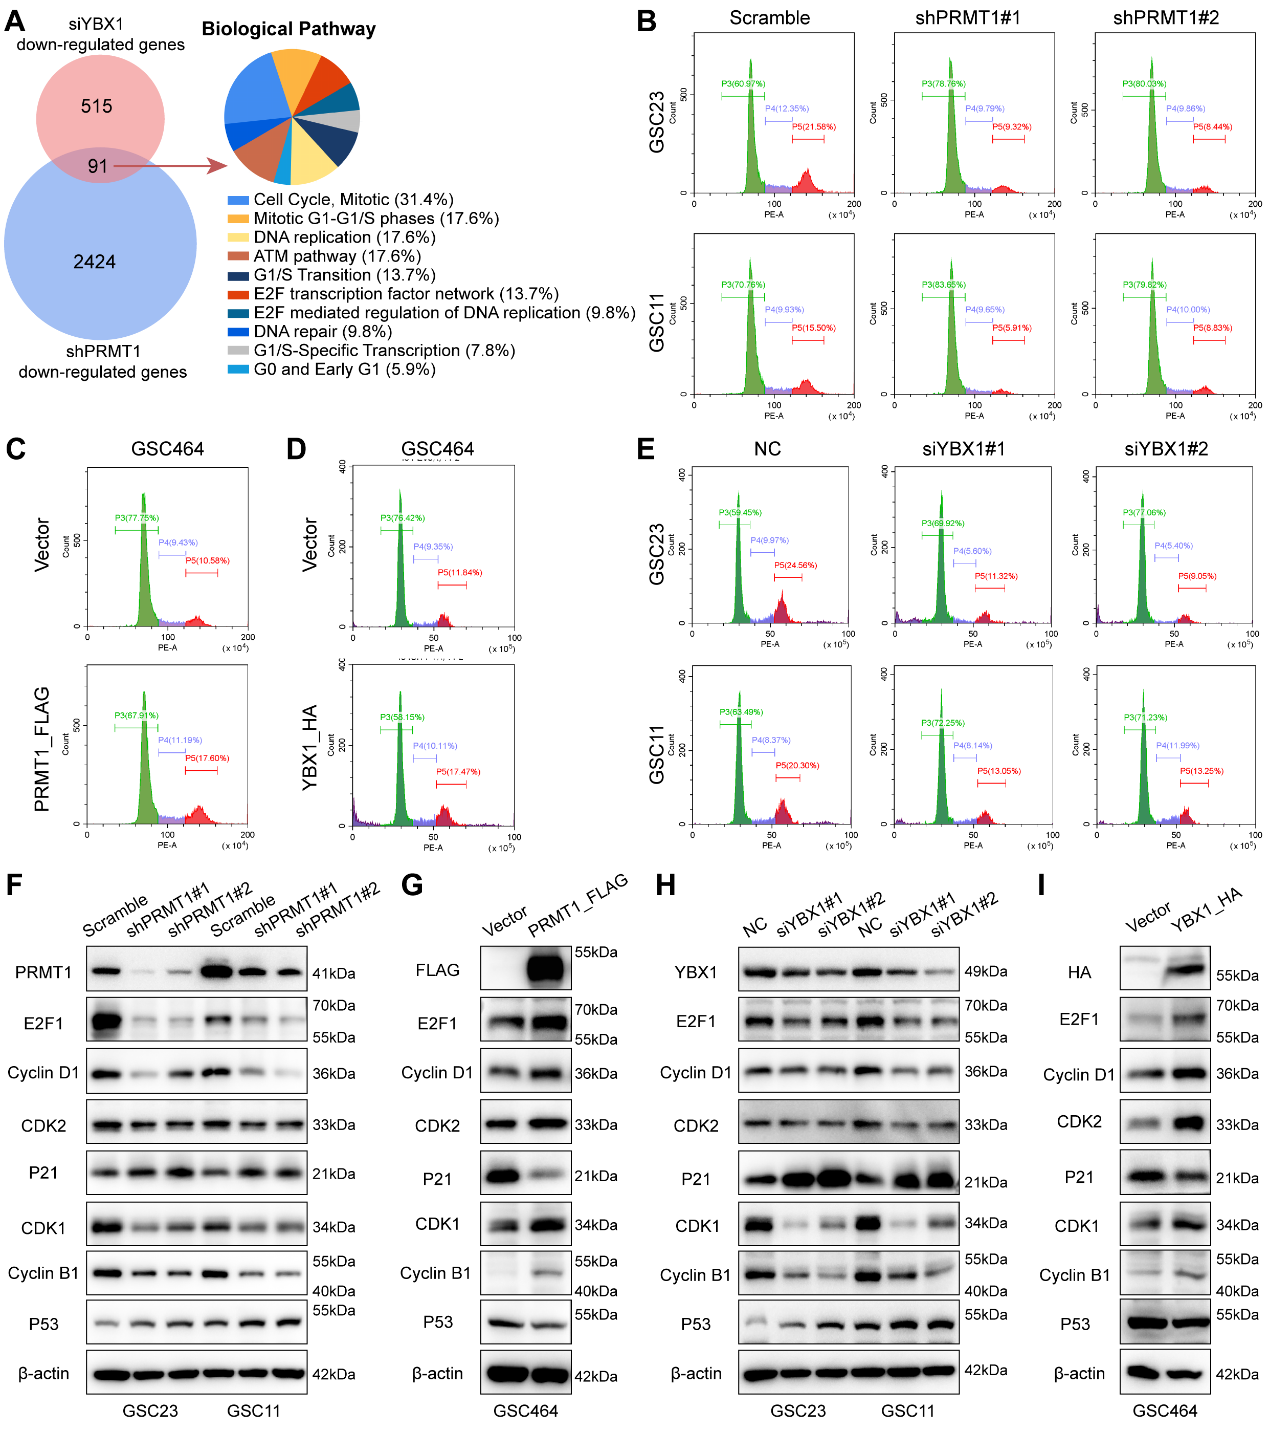


**Fig. S6 The PRMT1-YBX1 axis regulates cell-cycle progression in GSCs.** (**A**) Venn diagram shows the overlap between genes downregulated following PRMT1 knockdown in GSC23 cells and those downregulated following YBX1 knockdown in U251 cells. The 91 commonly downregulated genes were subjected to bioinformatic analysis, and the enriched biological pathways are shown.(**B**, **C**) Flow cytometric analysis of cell-cycle distribution in GSC23 and GSC11 cells following PRMT1 inhibition (**B**) and in GSC464 cells following PRMT1 overexpression (**C**). (**D**, **E**) Flow cytometric analysis of cell-cycle distribution in GSC464 cells following YBX1 overexpression (**D**) and in GSC23 and GSC11 cells following YBX1 inhibition (**E**).(**F**-**I**) Immunoblot analysis of E2F1, Cyclin D1, CDK2, P21, CDK1, Cyclin B1, and P53 in GSC23 and GSC11 cells following PRMT1 (**F**) or YBX1 (**H**) inhibition, and in GSC464 cells following PRMT1 (**G**) or YBX1 (**I**) overexpression.

**
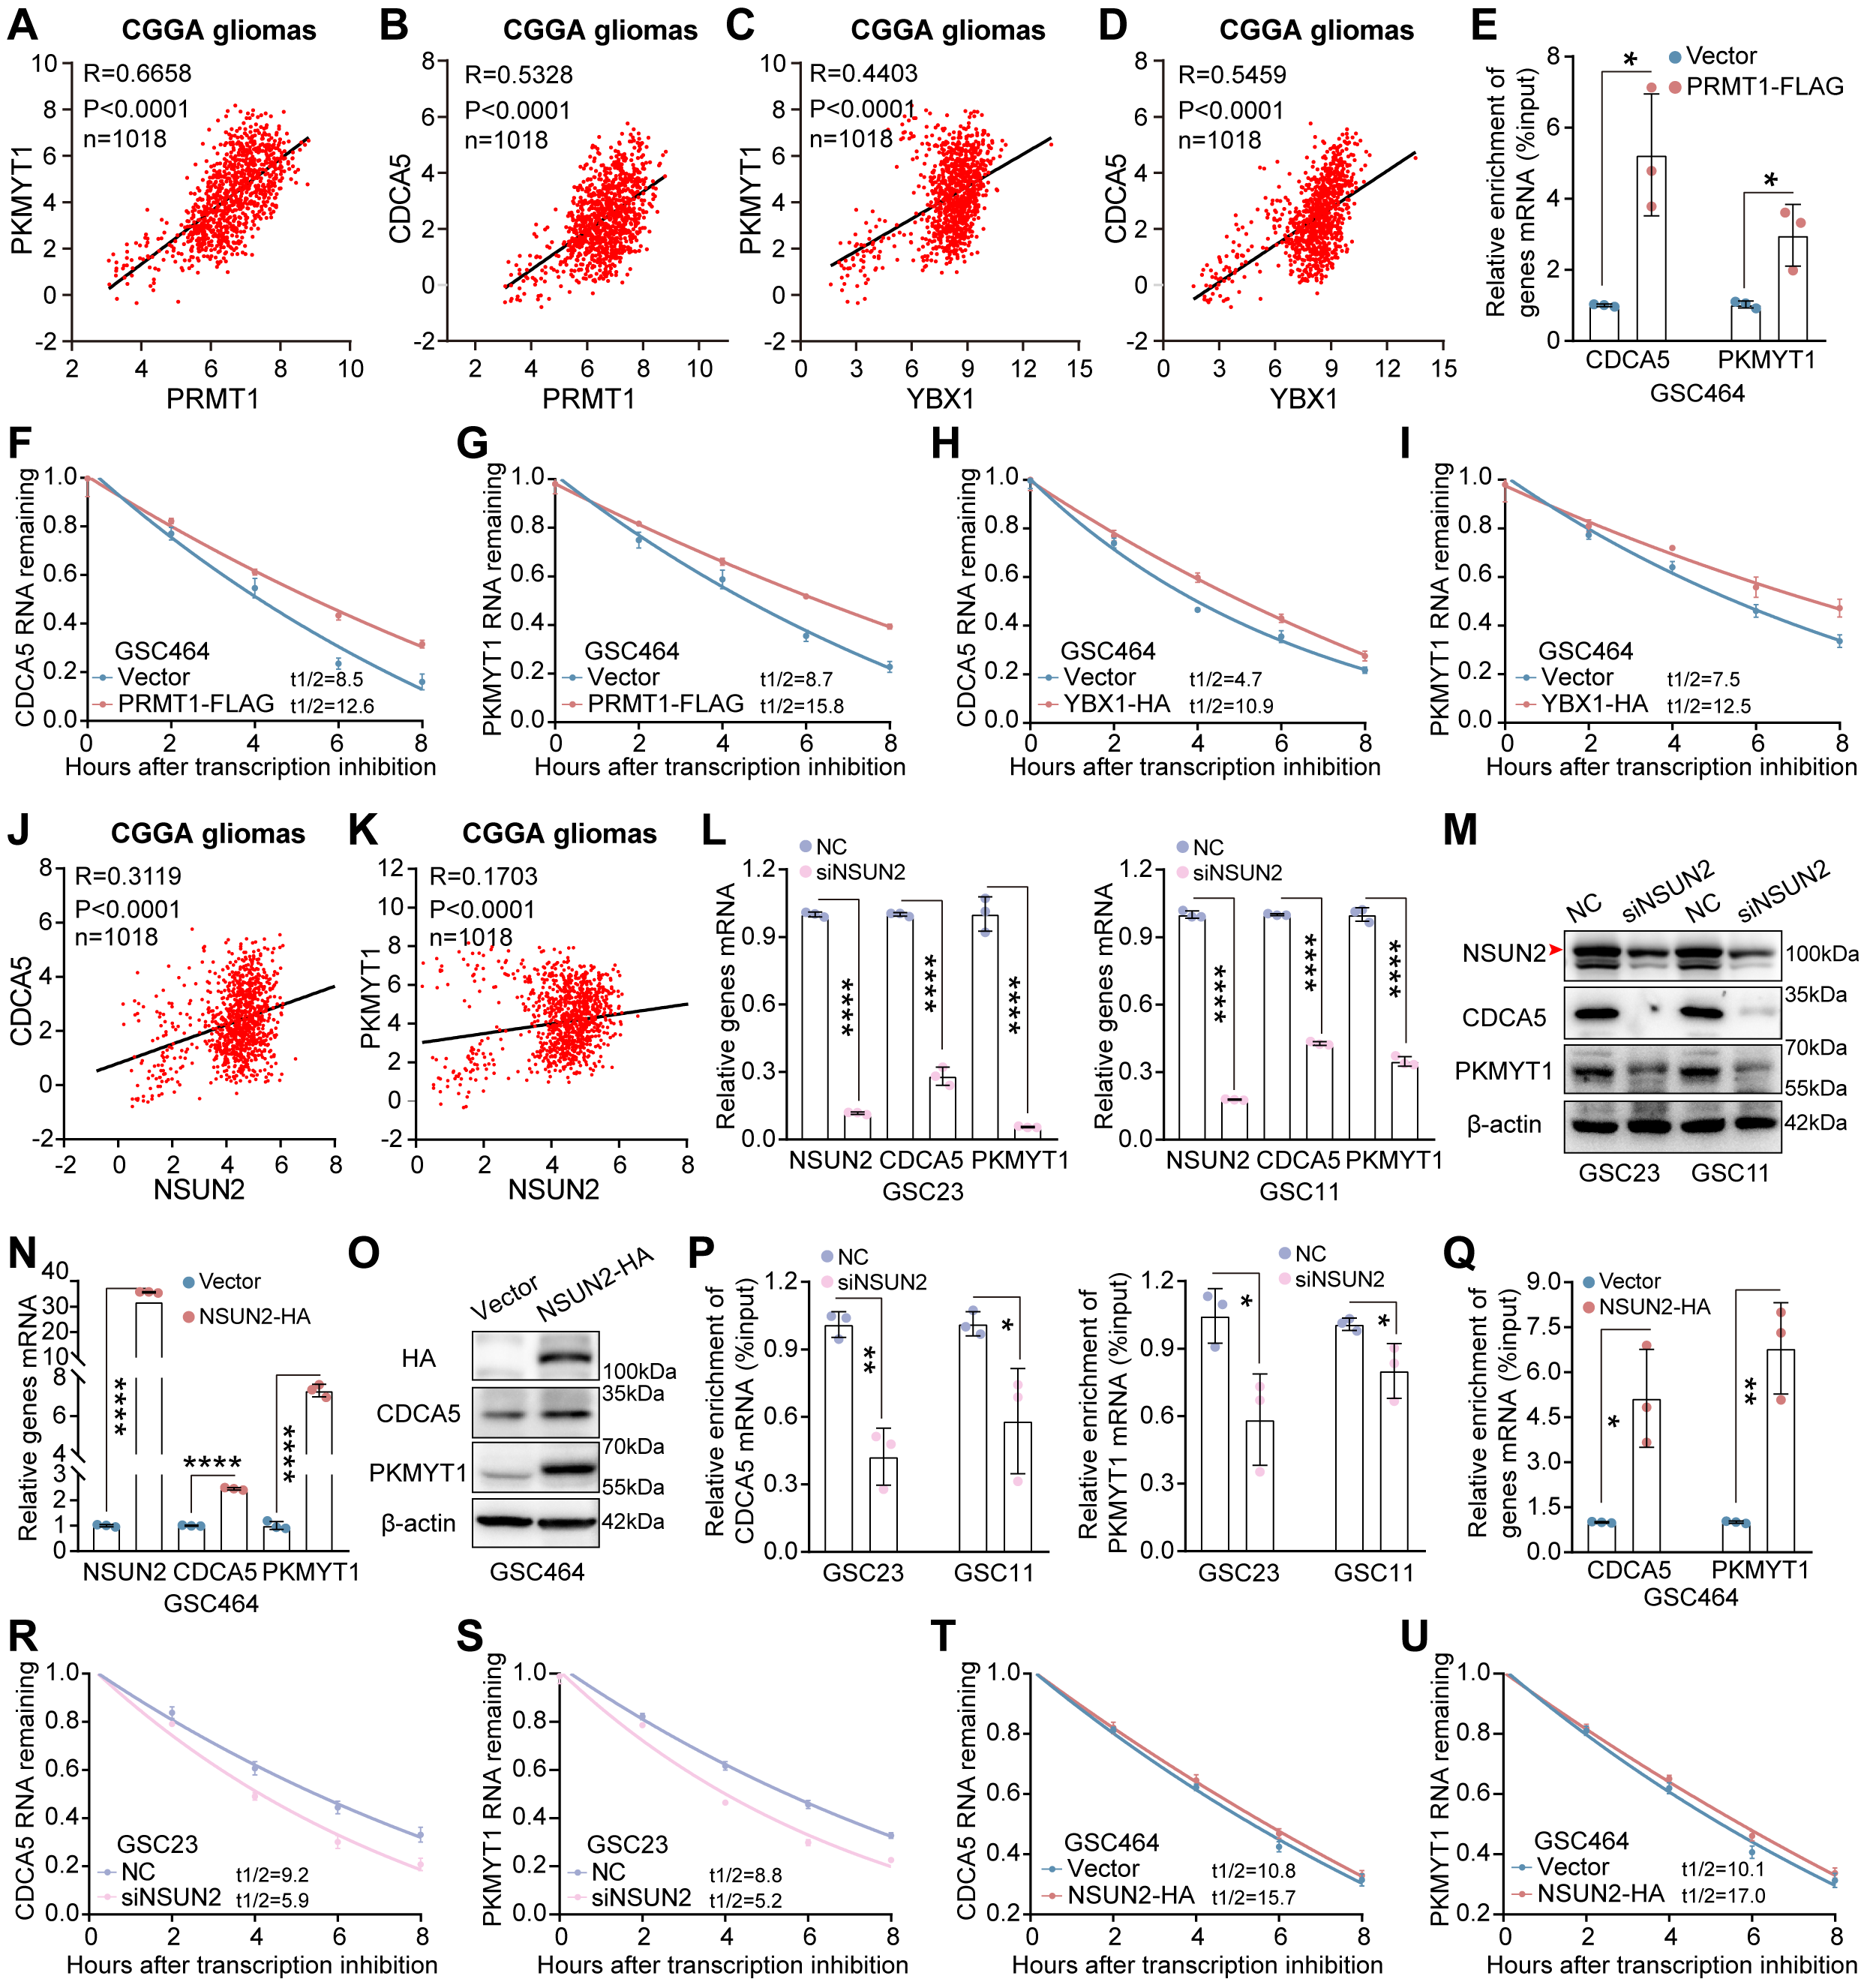
**

**Fig. S7 PRMT1-YBX1 and NSUN2 coordinately promotes the expression of PKMYT1 and CDCA5 and their mRNA stability.** (**A**-**D**) Correlation analyses in the CGGA cohort showing the associations between PRMT1 and PKMYT1 (**A**), PRMT1 and CDCA5 (**B**), YBX1 and PKMYT1 (**C**), and YBX1 and CDCA5 (**D**). (**E**) RIP-qPCR analysis shows the effects of PRMT1 overexpression on YBX1 binding to *CDCA5* and *PKMYT1* transcripts in GSC464 cells.(**F**-**I**) Cells were treated with actinomycin D for the indicated times (0, 2, 4, 6, and 8 h), and mRNA decay was measured by RT-qPCR in GSC464 cells following PRMT1 overexpression for CDCA5 (**F**) and PKMYT1 (**G**), or following YBX1 overexpression for CDCA5 (**H**) and PKMYT1 (**I**).(**J**, **K**) Correlation analysis of the CGGA cohort revealed associations between NSUN2 and CDCA5 (**J**) and between NSUN2 and PKMYT1 (**K**) in glioma patients.(**L**-**O**) NSUN2 regulates PKMYT1 and CDCA5 expressions. RT-qPCR analysis of *PKMYT1* and *CDCA5* mRNA levels in GSC23 and GSC11 cells following NSUN2 knockdown (**L**) and in GSC464 cells following NSUN2 overexpression (**N**). Immunoblot analysis of PKMYT1 and CDCA5 protein levels in GSC23 and GSC11 cells following NSUN2 knockdown (**M**) and in GSC464 cells following NSUN2 overexpression (**O**). (**P**, **Q**) RIP-qPCR analysis shows the effects of NSUN2 knockdown on YBX1 binding to *CDCA5* and *PKMYT1* transcripts in GSC23 and GSC11 cells (**P**), the effects of NSUN2 overexpression on YBX1 binding to *CDCA5* and *PKMYT1* transcripts in GSC464 cells (**Q**). (**R**-**U**) Cells were treated with actinomycin D for the indicated times (0, 2, 4, 6, and 8 h), and mRNA decay was measured by RT-qPCR in GSC23 cells following NSUN2 knockdown for CDCA5 (**R**) and PKMYT1 (**S**), and in GSC464 cells following NSUN2 overexpression for CDCA5 (**T**) and PKMYT1 (**U**). *P < 0.05, **P < 0.01, ****P < 0.0001.

**Table S1. Sequences of siRNAs and shRNAs.**

| shRNA/siRNA/sgRNA | Sequence (5'-3') |
| --- | --- |
| shRNA_Scramble | CAACAAGATGAAGAGCACAA |
| shPRMT1#1 | GCGAGGAGATCTTCGGCACCA |
| shPRMT1#2 | GGACATGACATCCAAAGAT |
| siRNA_NC | UUCUCCGAACGUGUCACGUTT |
| siPRMT1 | UUGUAGUCUUUGUACUGCC |
| siYBX1#1 | GGAACGGAUAUGGUUUCAUTT |
| siYBX1#2 | GCAGACCGUAACCAUUAUATT |
| YBX1 sgRNA | GTAATGGCTTTTGTAGGGTG |
| siNSUN2 | CACGTGTTCACTAAACCCTAT |

**Table S2. Primer sequences for RT-qPCR and RIP-qPCR.**

| Genes | Sequence (5'-3') |
| --- | --- |
| PRMT1 | F: CAAGGTCATCGGGATCGAGTG |
| R: ACGTGGTCTAACTTGTTGGCT |
| YBX1 | F: GGGGACAAGAAGGTCATCGC |
| R: CGAAGGTACTTCCTGGGGTTA |
| NSUN2 | F: ACCTGGCTCAAAGACCACACAG |
| R: TGGCTTGATGGACGAGCAGGTA |
| CDCA5 | F: CCAGCGGAAATCAGGCTCTGAA |
| R: CGATCCTCTTTAAGACGATGGGC |
| PKMYT1 | F: TATGGGACAGCAGCGGATGTGT |
| R: AGAACGCAGCTCGGAAGACAGA |
| β-actin | F: TCCTGTGGCATCCACGAAACT |
| R: GAAGCATTTGCGGTGGACGAT |
